# Supplementary material
Source: PubMed Central journal article supplement (PMC3200068)
Supplement: NIHMS320818-supplement-Supplement1.pdf [file NIHMS320818-supplement-Supplement1.pdf]

## Supplementary Appendix

This appendix has been provided by the authors to give readers additional information about their work.

Supplement to: Cohen MS, Chen YQ, McCauley M, et al. Prevention of HIV-1 infection with early antiretroviral therapy. *N Engl J Med* 2011;365:493-505. DOI: 10.1056/NEJMoa1105243.

## HPTN 052: Supplementary Appendix

### Table of Contents

|                                                                                  |    |
|----------------------------------------------------------------------------------|----|
| Author List and Affiliation .....                                                | 2  |
| IRBs/ECs and Other Regulatory Bodies by Site.....                                | 5  |
| Full Inclusion/Exclusion Criteria.....                                           | 7  |
| Overview of Study Procedures .....                                               | 10 |
| Enrollment of HIV-Serodiscordant Couples by Site.....                            | 11 |
| Baseline Characteristics of the Participants at Enrollment by Treatment Arm..... | 12 |
| Follow-up CD4+, HIV RNA, and Their Respective IQRs by Arm.....                   | 14 |
| Incidence of Transmission and Clinical Events by Region .....                    | 15 |
| Adherence Counseling Checklists .....                                            | 16 |
| Most Frequently Used Initial Primary Regimens by Arm .....                       | 19 |
| Most Frequently Used Primary Regimen by Site and by Arm .....                    | 20 |
| ART Adherence by Pill Count by Arm.....                                          | 24 |
| Clinical Endpoints by Arm .....                                                  | 25 |
| Graded Lab Abnormalities by Arm .....                                            | 27 |
| Incidence of Adverse Events by MedDRA Body System by Arm .....                   | 28 |
| Death Summary .....                                                              | 29 |
| Acknowledgements.....                                                            | 30 |

### Author List and Affiliation

| Name                  | Degree(s)  | Affiliation                                                                                                              |
|-----------------------|------------|--------------------------------------------------------------------------------------------------------------------------|
| Burns, David          | MD, MPH    | National Institutes of Health, National Institute of Allergy and Infectious Diseases, Division of AIDS, Bethesda, MD USA |
| Celentano, David      | ScD, MHS   | Johns Hopkins Bloomberg School of Public Health, Baltimore, MD USA                                                       |
| Chariyalertsak, Suwat | MD, DrPH   | Research Institute for Health Sciences, Chiang Mai University, Chiang Mai, Thailand                                      |
| Chen, Ying Q.         | PhD        | Vaccine and Infectious Disease Division, Fred Hutchinson Cancer Research Center, Seattle, WA USA                         |
| Cohen, Myron S.       | MD         | University of North Carolina School of Medicine, Chapel Hill, NC USA                                                     |
| De Bruyn, Guy         | MBBCh, MPH | Perinatal HIV Research Unit, University of the Witwatersrand, Johannesburg, SA                                           |
| Elharrar, Vanessa     | MD, PhD    | National Institutes of Health, National Institute of Allergy and Infectious Diseases, Division of AIDS, Bethesda, MD USA |
| Eron, Joseph          | MD         | University of North Carolina School of Medicine, Chapel Hill, NC USA                                                     |
| Eshleman, Susan H.    | MD, PhD    | Dept. of Pathology, Johns Hopkins University School of Medicine, Baltimore, MD USA                                       |
| Essex, Myron          | DVM, PhD   | Harvard School of Public Health, Boston, MA USA                                                                          |
| Fleming, Tom          | PhD        | University of Washington, Seattle, WA USA                                                                                |
| Gallant , Joel        | MD, MPH    | Johns Hopkins University School of Medicine, Baltimore, MD USA                                                           |
| Gamble, Theresa       | PhD        | FHI, Durham, NC USA                                                                                                      |

| <b>Name</b>                     | <b>Degree(s)</b>  | <b>Affiliation</b>                                                                                                        |
|---------------------------------|-------------------|---------------------------------------------------------------------------------------------------------------------------|
| Godbole, Sheela V.              | MD                | National AIDS Research Institute (ICMR), Pune, India                                                                      |
| Grinsztejn, Beatriz             | MD, PhD           | Instituto de Pesquisa Clinica Evandro Chagas, Fiocruz, Rio de Janeiro, Brazil                                             |
| Hakim, James Gita               | MD                | University of Zimbabwe, Harare, Zimbabwe                                                                                  |
| Havlir, Diane                   | MD                | University of California, San Francisco, CA USA                                                                           |
| Hoffman, Irving F.              | PA, MPH           | University of North Carolina School of Medicine, Chapel Hill, NC USA                                                      |
| Hosseinipour, Mina Christine    | MD, MPH           | UNC Project, Lilongwe Malawi and University of North Carolina School of Medicine, Chapel Hill, NC USA                     |
| Kumarasamy, Nagalingeswaran     | MBBS, PhD         | Y. R. Gaitonade Center for AIDS Research and Education, Chennai, India                                                    |
| Kumwenda, Johnstone             | FRCP              | College of Medicine-Johns Hopkins Project, Blantyre, Malawi                                                               |
| Makhema, Joseph                 | MB, ChB, FRCP(UK) | Botswana Harvard AIDS Institute, Gaborone, Botswana                                                                       |
| Mayer, Kenneth H.               | MD                | Fenway Health, Boston, MA USA                                                                                             |
| McCauley, Marybeth              | MPH               | FHI, Arlington, VA USA                                                                                                    |
| Mehendale, Sanjay               | MD, MPH           | National AIDS Research Institute (ICMR), Pune, India                                                                      |
| Mills, Lisa A.                  | MD, MSc           | CDC Division of HIV/AIDS Prevention KEMRI-CDC Research and Public Health Collaboration HIV Research Branch, Kisumu, Kenya |
| Nielsen-Saines, Karin           | MD, MPH           | David Geffen UCLA School of Medicine, Division of Infectious Diseases, Los Angeles, CA USA                                |
| Pilotto, Jose Henrique da Silva | MD, PhD           | Hospital Geral de Nova Iguacu and Laboratorio de AIDS e Imunologia Molecular-IOC/Fiocruz, Rio de Janeiro, Brazil          |

| Name                     | Degree(s)             | Affiliation                                                                                                |
|--------------------------|-----------------------|------------------------------------------------------------------------------------------------------------|
| Piwowar-Manning, Estelle | BS MT(ASCP)           | Dept. of Pathology, Johns Hopkins University School of Medicine, Baltimore, MD USA                         |
| Ribaldo, Heather         | PhD                   | Harvard School of Public Health, Boston, MA USA.                                                           |
| Sanne, Ian               | MBBCH, FCP(SA), DTM&H | Department of Medicine, University of Witwatersrand, Johannesburg, SA.                                     |
| Santos, Breno Riegel     | MD                    | Hospital Nossa Senhora da Conceição, Porto Alegre RS, Brazil                                               |
| Swindells, Susan         | MBBS                  | University of Nebraska Medical Center, Omaha, NE USA                                                       |
| Taha, Taha E.            | MBBS, PhD             | Department of Epidemiology, Bloomberg School of Public Health, Johns Hopkins University, Baltimore, MD USA |
| Wang, Lei                | PhD                   | Vaccine and Infectious Disease Division, Fred Hutchinson Cancer Research Center, Seattle, WA USA           |

The table below outlines all associated Institutional Review Boards/Ethics Committees for each clinical research site. In some cases, a local site partnered with a US institution to conduct HPTN 052; therefore, a US IRB also had a responsibility to review and approve the research. The table also includes non-US regulatory bodies that reviewed the study (for example local Ministries of Health, Poisons Boards, etc).

### IRBs/ECs and Other Regulatory Bodies by Site

| Site                   | Affiliated IRBs/ECs and Regulatory Bodies                                                                                                                                                                                                                                                                                                                                                                                         |
|------------------------|-----------------------------------------------------------------------------------------------------------------------------------------------------------------------------------------------------------------------------------------------------------------------------------------------------------------------------------------------------------------------------------------------------------------------------------|
| Porto Alegre, Brazil   | <ul style="list-style-type: none"> <li>• UCLA Office for Protection of Research Subjects: Medical Institutional Review Board</li> <li>• Brazil Ministério da Saúde: CONEP: Comissão Nacional de Ética em Pesquisa</li> <li>• Gerencia de Ensino e Pesquisa: Comitê de Ética em Pesquisa do Grupo Hospitalar Conceição-GHC</li> </ul>                                                                                              |
| Rio de Janeiro, Brazil | <ul style="list-style-type: none"> <li>• UCLA Office for Protection of Research Subjects: Medical Institutional Review Board</li> <li>• Instituto de Pesquisa Clínica Evandro Chagas: Comitê de Ética em Pesquisa</li> <li>• Brazil Ministério da Saúde: CONEP: Comissão Nacional de Ética em Pesquisa</li> <li>• Grupo Hospitalar Conceição-GHC: Comitê de Ética em Pesquisa</li> </ul>                                          |
| Boston, MA, USA        | <ul style="list-style-type: none"> <li>• Fenway Community Health Center: Fenway Community Health Center Institutional Review Board</li> </ul>                                                                                                                                                                                                                                                                                     |
| Chennai, India         | <ul style="list-style-type: none"> <li>• Fenway Community Health Center: Fenway Community Health Center Institutional Review Board</li> <li>• YRG CARE Institutional Review Board</li> <li>• University of California, San Diego: Human Research Protections Program</li> <li>• Health Ministry Screening Committee (India)</li> </ul>                                                                                            |
| Pune, India            | <ul style="list-style-type: none"> <li>• National AIDS Research Institute (ICMR): National AIDS Research Institute (NARI) Ethics Committee</li> <li>• Johns Hopkins University School of Medicine: Johns Hopkins Medicine Institutional Review Board</li> <li>• Health Ministry Screening Committee (India)</li> </ul>                                                                                                            |
| Chiang Mai, Thailand   | <ul style="list-style-type: none"> <li>• Johns Hopkins Bloomberg School of Public Health Institutional Review Boards</li> <li>• Human Experimentation Committee, Research Institute for Health Sciences, Chiang Mai University</li> <li>• Research Ethics Committee, Faculty of Medicine, Chiang Mai University</li> <li>• Ethical Review Committee for Research in Human Subjects Ministry of Public Health, Thailand</li> </ul> |
| Kisumu, Kenya          | <ul style="list-style-type: none"> <li>• Kenya Medical Research Institute: KEMRI National Ethical Review Committee</li> <li>• CDC Atlanta: CDC National Center for HIV/AIDS, Viral Hepatitis, STDs and TB Prevention IRB</li> <li>• Kenya National Pharmacy and Poisons Board (PPB)</li> </ul>                                                                                                                                    |

| Site                       | Affiliated IRBs/ECs and Regulatory Bodies                                                                                                                                                                                                                                                                                                                                                     |
|----------------------------|-----------------------------------------------------------------------------------------------------------------------------------------------------------------------------------------------------------------------------------------------------------------------------------------------------------------------------------------------------------------------------------------------|
| Harare, Zimbabwe           | <ul style="list-style-type: none"> <li>• University of California at San Francisco: Committee on Human Research, Office of Research Administration</li> <li>• Medical Research Council of Zimbabwe: Medical Research Council of Zimbabwe (MRCZ) Institutional Review Board</li> <li>• Medicines Control Authority of Zimbabwe (MCAZ)</li> <li>• Research Council of Zimbabwe (RCZ)</li> </ul> |
| Blantyre, Malawi           | <ul style="list-style-type: none"> <li>• University of Malawi College of Medicine: College of Medicine Research &amp; Ethics Committee (COMREC)</li> <li>• Johns Hopkins University Bloomberg School of Public Health: Institutional Review Board</li> </ul>                                                                                                                                  |
| Lilongwe, Malawi           | <ul style="list-style-type: none"> <li>• Malawi Ministry of Health &amp; Population: National Health Sciences Research Committee</li> <li>• University of North Carolina School of Medicine: Committee on the Protection of the Rights of Human Subjects</li> </ul>                                                                                                                           |
| Gaborone, Botswana         | <ul style="list-style-type: none"> <li>• Botswana Ministry of Health: Health Research and Development Committee</li> <li>• Harvard School of Public Health: Human Subjects Committee</li> </ul>                                                                                                                                                                                               |
| Johannesburg, South Africa | <ul style="list-style-type: none"> <li>• University of Witwatersrand: Human Research Ethics Committee: Medical</li> <li>• Medicines Control Council (South Africa)</li> </ul>                                                                                                                                                                                                                 |
| Soweto, South Africa       | <ul style="list-style-type: none"> <li>• University of Witwatersrand: Human Research Ethics Committee: Medical</li> <li>• Medicines Control Council (South Africa)</li> </ul>                                                                                                                                                                                                                 |

## Full Inclusion/Exclusion Criteria

### HPTN 052 Study Inclusion Criteria

| Couple                                                                                                                                                                                                                                                                                                                                                                                                                                                                                                                                                                                                                   | Index Case (HIV-infected)                                                                                                                                                                                                                                                                                                                                                                                                                                                                                                                                                                                                                                                                                         | Partner (HIV-uninfected)                                                                                      |
|--------------------------------------------------------------------------------------------------------------------------------------------------------------------------------------------------------------------------------------------------------------------------------------------------------------------------------------------------------------------------------------------------------------------------------------------------------------------------------------------------------------------------------------------------------------------------------------------------------------------------|-------------------------------------------------------------------------------------------------------------------------------------------------------------------------------------------------------------------------------------------------------------------------------------------------------------------------------------------------------------------------------------------------------------------------------------------------------------------------------------------------------------------------------------------------------------------------------------------------------------------------------------------------------------------------------------------------------------------|---------------------------------------------------------------------------------------------------------------|
| <ul style="list-style-type: none"> <li>• Men and women age <math>\geq 18</math> years.</li> <li>• Willing to disclose HIV test results to partner.</li> <li>• Not intending to relocate out of the area for the duration of study participation and does not have a job or other obligations that may require long absences from the area.</li> <li>• Plans to maintain a sexual relationship with the person who is enrolled in the study with them.</li> <li>• Reports having sex (vaginal or anal) with partner at least 3 times in the last 3 months (reports separately and not in front of each other).</li> </ul> | <ul style="list-style-type: none"> <li>• Positive HIV serology obtained within 60 days prior to enrollment</li> <li>• Willing to be randomized if pregnant or breast feeding               <ul style="list-style-type: none"> <li>▪ CD4+ cell count of 350-550 cells/mm<sup>3</sup></li> <li>▪ Hemoglobin <math>\geq 7.5</math> g/dL; platelet count <math>\geq 50,000/\mu\text{L}</math>; AST (SGOT), ALT (SGPT), and alkaline phosphatase <math>\leq 5</math> x ULN; total bilirubin <math>\leq 2.5</math> x ULN; calculated creatinine clearance <math>\geq 60</math> mL/min; absolute neutrophil count <math>\geq 750</math> mm<sup>3</sup> or <math>0.750 \times 10^9/\text{L}</math></li> </ul> </li> </ul> | <ul style="list-style-type: none"> <li>• Negative HIV serology within 14 days prior to enrollment.</li> </ul> |



### HPTN 052 Study Exclusion Criteria

| Couple                                                                                                                                                                                                                                                                                                                                                                                                                                                                                                                                                                                                                            | Index Case (HIV-infected)                                                                                                                                                                                                                                                                                                                                                                                                                                                                                                                                                                                                                                                                                                                                                                                                                                                                                                                                                                                                                                                                                                                                                                                                                                                                                                                                                                                                                                                              |
|-----------------------------------------------------------------------------------------------------------------------------------------------------------------------------------------------------------------------------------------------------------------------------------------------------------------------------------------------------------------------------------------------------------------------------------------------------------------------------------------------------------------------------------------------------------------------------------------------------------------------------------|----------------------------------------------------------------------------------------------------------------------------------------------------------------------------------------------------------------------------------------------------------------------------------------------------------------------------------------------------------------------------------------------------------------------------------------------------------------------------------------------------------------------------------------------------------------------------------------------------------------------------------------------------------------------------------------------------------------------------------------------------------------------------------------------------------------------------------------------------------------------------------------------------------------------------------------------------------------------------------------------------------------------------------------------------------------------------------------------------------------------------------------------------------------------------------------------------------------------------------------------------------------------------------------------------------------------------------------------------------------------------------------------------------------------------------------------------------------------------------------|
| <ul style="list-style-type: none"> <li>• Reports a history of injection drug use within the last five years.</li> <li>• Previous and/or current participant in an HIV vaccine study.</li> <li>• Any condition that, in the opinion of the site investigator, would make participation in the study unsafe, complicate interpretation of study outcome data, or otherwise interfere with achieving the study objectives.</li> <li>• Incarceration in a correctional facility, prison, or jail; and involuntary incarceration in a medical facility for psychiatric or physical (<i>e.g.</i> infectious disease) illness</li> </ul> | <ul style="list-style-type: none"> <li>• Current or previous AIDS-defining illness</li> <li>• Current or previous use of any ART drugs (some exceptions apply)</li> <li>• Documented or suspected acute hepatitis within 30 days prior to enrollment, irrespective of AST (SGOT) and ALT (SGPT) values.</li> <li>• Acute therapy for serious medical illnesses, in the opinion of the site investigator, within 14 days prior to enrollment. Candidates with chronic, acute, or recurrent infections that are serious, in the opinion of the site investigator, who must continue with chronic (maintenance) therapy (<i>e.g.</i>, TB), must have completed at least 14 days of therapy prior to study entry and be clinically stable.</li> <li>• Radiation therapy or systemic chemotherapy within 45 days prior to enrollment. NOTE: Anticipated need for systemic chemotherapy while on study is not permitted.</li> <li>• Any immunomodulator or other investigational therapy within 30 days prior to enrollment.</li> <li>• Active drug or alcohol use or dependence that, in the opinion of the site investigator, would interfere with adherence to study requirements.</li> <li>• Vomiting or inability to swallow medications due to an active, pre-existing condition that prevents adequate swallowing and absorption of study medication.</li> <li>• Need for a prohibited medication</li> <li>• Allergy/sensitivity to any study drugs or their formulations.</li> </ul> |

Note: There are no explicit exclusion criteria for HIV-1 uninfected participants (partners)

### Overview of Study Procedures

| Procedure                                                   | Index Case (HIV-infected)                                                    | Partner (HIV-uninfected)                                             |
|-------------------------------------------------------------|------------------------------------------------------------------------------|----------------------------------------------------------------------|
| <b>Sexual History Assessment</b>                            | Enrollment, Quarterly, Annual                                                | Enrollment, Quarterly, Annual                                        |
| <b>HIV testing (includes pre and post-test counseling)</b>  | N/A                                                                          | Quarterly, Annual                                                    |
| <b>Adherence Assessment<sup>1</sup></b>                     | Week 2*, Monthly**, Quarterly, Annual                                        | N/A                                                                  |
| <b>Couples Counseling</b>                                   | Enrollment, Week 2*, Monthly**, Quarterly, Annual                            | Enrollment, Week 2*, Monthly**, Quarterly, Annual                    |
| <b>Adherence Counseling<sup>1</sup></b>                     | Enrollment, Week 2*, Monthly**, Quarterly, Annual, Virologic Failure         | Enrollment, Week 2*, Monthly**, Quarterly, Annual, Virologic Failure |
| <b>Quality of Life Assessment</b>                           | Enrollment, Quarterly, Annual                                                | N/A                                                                  |
| <b>Physical exam (includes medical history)<sup>2</sup></b> | Enrollment, Week 2*, Monthly**, Quarterly, Annual                            | Enrollment, Quarterly, Annual, Seroconversion                        |
| <b>Chest x-ray</b>                                          | Enrollment                                                                   | N/A                                                                  |
| <b>Genital exam</b>                                         | Enrollment, Annual                                                           | Enrollment, Annual, Seroconversion                                   |
| <b>Circumcision status<sup>3</sup></b>                      | Enrollment, Annual                                                           | Enrollment, Annual                                                   |
| <b>Pelvic exam</b>                                          | Enrollment, Annual, Seroconversion                                           | Enrollment, Annual, Seroconversion                                   |
| <b>Provide study medications<sup>4</sup></b>                | Enrollment, Week 2*, Monthly**, Quarterly, Annual                            | N/A                                                                  |
| <b>Pregnancy test</b>                                       | Enrollment, Monthly**, Quarterly, Annual                                     | N/A                                                                  |
| <b>GC, CT, TV, BV, candida</b>                              | Enrollment, Annual                                                           | Enrollment, Annual                                                   |
| <b>HIV EIA/Western blot/IFA</b>                             | N/A                                                                          | Quarterly, Annual                                                    |
| <b>CBC, Blood chemistry, LFTs</b>                           | Enrollment, Week 2* Monthly**, Quarterly, Annual                             | Seroconversion                                                       |
| <b>CD4 cell count</b>                                       | Enrollment, Quarterly, Annual                                                | Seroconversion                                                       |
| <b>Blood plasma HIV-1 RNA</b>                               | Enrollment, Monthly***, Quarterly, Annual, Seroconversion, Virologic Failure | Seroconversion                                                       |
| <b>Syphilis serology</b>                                    | Enrollment, Annual                                                           | Enrollment, Annual                                                   |
| <b>HIV genotyping</b>                                       | Enrollment, Seroconversion, Virologic Failure                                | Seroconversion                                                       |
| <b>Plasma sample storage</b>                                | Enrollment, Quarterly, Annual, Seroconversion, Virologic Failure             | Enrollment, Quarterly, Annual, Seroconversion                        |
| <b>Serum sample storage</b>                                 | Enrollment, Quarterly, Annual                                                | Enrollment, Annual, Seroconversion                                   |
| <b>Whole blood sample storage</b>                           | Enrollment                                                                   | Enrollment                                                           |
| <b>PBMCs sample storage</b>                                 | Enrollment, Quarterly, Annual, Seroconversion                                | Enrollment, Quarterly, Annual, Seroconversion                        |
| <b>Genital secretions storage</b>                           | Enrollment, Annual, Seroconversion                                           | Seroconversion                                                       |

N/A = not applicable

\*The Week 2 visit occurs after the Index Case initiated ART for a short interval clinical follow-up.

\*\*Monthly visits take place first three months of the study and after the Index Cases in the delay arm initiate ART.

\*\*\*For Arm 1, performed at one monthly visit following enrollment. For Arm 2, one monthly visit following initiation of ART. Thereafter, per the table above (*i.e.* at quarterly, annual, seroconversion, and virologic failure visits).

<sup>1</sup> Adherence assessments and counseling take place for couples in which the Index Case was on ART.

<sup>2</sup> Includes collection of concomitant medications information.

<sup>3</sup> Circumcision status (men only) is not collected once positive circumcision is established.

<sup>4</sup> Study medications are generally dispensed at quarterly visits; a subset of participants are dispensed ART at monthly visits for closer adherence monitoring.

### Enrollment of HIV-Serodiscordant Couples by Site

| Site                       | Enrollment<br>(Number of Couples) |
|----------------------------|-----------------------------------|
| Porto Alegre, Brazil       | 90                                |
| Rio de Janeiro, Brazil     | 186                               |
| Boston, MA, USA            | 2                                 |
| Chennai, India             | 250                               |
| Pune, India                | 175                               |
| Chiang Mai, Thailand       | 106                               |
| Kisumu, Kenya              | 60                                |
| Harare, Zimbabwe           | 240                               |
| Blantyre, Malawi           | 230                               |
| Lilongwe, Malawi           | 251                               |
| Gaborone, Botswana         | 77                                |
| Johannesburg, South Africa | 46                                |
| Soweto, South Africa       | 50                                |

**Baseline Characteristics of the Participants at Enrollment by Treatment Arm.**

| Characteristics                      | HIV-1 infected Participants* |                    | HIV-1 uninfected Participants* |                    |
|--------------------------------------|------------------------------|--------------------|--------------------------------|--------------------|
|                                      | Early<br>(N=886)             | Delayed<br>(N=877) | Early<br>(N=893)               | Delayed<br>(N=882) |
| <b>Demographic</b>                   |                              |                    |                                |                    |
| Female sex                           | 432 (49%)                    | 441 (50%)          | 441 (49%)                      | 418 (47%)          |
| Age group                            |                              |                    |                                |                    |
| 18-25                                | 145 (16%)                    | 161 (18%)          | 154 (17%)                      | 174 (20%)          |
| 26-40                                | 556 (63%)                    | 547 (62%)          | 537 (60%)                      | 526 (60%)          |
| >40                                  | 185 (21%)                    | 169 (19%)          | 202 (23%)                      | 182 (21%)          |
| Education level                      |                              |                    |                                |                    |
| No schooling                         | 101 (11%)                    | 69 (8%)            | 112 (13%)                      | 77 (9%)            |
| primary schooling                    | 360 (41%)                    | 347 (40%)          | 317 (35%)                      | 344 (39%)          |
| Secondary schooling                  | 346 (39%)                    | 388 (44%)          | 373 (42%)                      | 367 (42%)          |
| Post-secondary schooling             | 79(9%)                       | 72 (8%)            | 91 (10%)                       | 93 (11%)           |
| Missing                              | 0 (0%)                       | 1 (<1%)            | 0 (0%)                         | 1 (<1%)            |
| Marital Status                       |                              |                    |                                |                    |
| Single                               | 49 (6%)                      | 38 (4%)            | 53 (6%)                        | 43 (5%)            |
| Married/living w/partner             | 833 (94%)                    | 833 (95%)          | 834 (93%)                      | 833 (94%)          |
| Widowed/separated/divorced           | 4 (<1%)                      | 6 (1%)             | 6 (1%)                         | 6 (1%)             |
| Region                               |                              |                    |                                |                    |
| North/South America                  | 142 (16%)                    | 136 (16%)          | 145 (16%)                      | 139 (16%)          |
| Asia                                 | 267 (30%)                    | 264 (30%)          | 268 (30%)                      | 264 (30%)          |
| Africa                               | 477 (54%)                    | 477 (54%)          | 480 (54%)                      | 479 (54%)          |
| <b>Sexual Activity</b>               |                              |                    |                                |                    |
| Any unprotected sex in last week     | 37 (6%)                      | 51 (8%)            | 49 (8%)                        | 53 (8%)            |
| No. of sex partners in last 3 months |                              |                    |                                |                    |
| 0-1                                  | 831 (94%)                    | 833 (95%)          | 863 (97%)                      | 844 (96%)          |
| 2-4                                  | 48 (5%)                      | 41 (5%)            | 29 (3%)                        | 36 (4%)            |
| >4                                   | 7 (1%)                       | 2 (<1%)            | 1 (<1%)                        | 1 (<1%)            |
| Missing                              | 0 (0%)                       | 1 (<1%)            | 0 (0%)                         | 1 (<1%)            |
| No. of sex acts in last week         |                              |                    |                                |                    |
| 0                                    | 246 (28%)                    | 225 (26%)          | 253 (28%)                      | 240 (27%)          |
| 1-2                                  | 430 (49%)                    | 438 (50%)          | 410 (46%)                      | 433 (49%)          |
| 3-4                                  | 156 (18%)                    | 158 (18%)          | 180 (20%)                      | 151 (17%)          |
| >4                                   | 54 (6%)                      | 55(6%)             | 50 (6%)                        | 57 (6%)            |
| Missing                              | 0 (0%)                       | 1 (<1%)            | 0 (0%)                         | 1 (<1%)            |
| <b>Clinical</b>                      |                              |                    |                                |                    |
| CD4 counts                           |                              |                    |                                |                    |
| Median (IQR)*                        | 442 (373-522)                | 428 (357-522)      | -                              | -                  |
| Plasma RNA                           |                              |                    |                                |                    |
| <400                                 | 54 (6%)                      | 43 (5%)            | -                              | -                  |
| 400-1,000                            | 24 (3%)                      | 33 (4%)            | -                              | -                  |
| 1,001-10,000                         | 212 (24%)                    | 183 (21%)          | -                              | -                  |
| 10,001-100,000                       | 407 (46%)                    | 432 (49%)          | -                              | -                  |
| 100,001-1,000,000                    | 186 (21%)                    | 186 (21%)          | -                              | -                  |

| Characteristics                                      | HIV-1 infected Participants* |                    | HIV-1 uninfected Participants* |                    |
|------------------------------------------------------|------------------------------|--------------------|--------------------------------|--------------------|
|                                                      | Early<br>(N=886)             | Delayed<br>(N=877) | Early<br>(N=893)               | Delayed<br>(N=882) |
| Missing                                              | 3 (<1%)                      | 4 (<1%)            | -                              | -                  |
| Women reporting prior ART use for PMTCT <sup>†</sup> | 115/432 (27%)                | 119/441 (27%)      | -                              | -                  |
| <b>STIs</b>                                          |                              |                    |                                |                    |
| Hepatitis B                                          | 46 (5%)                      | 45 (5%)            |                                |                    |
| Syphilis                                             | 29 (3%)                      | 32 (4%)            | 27 (3%)                        | 18 (2%)            |
| Gonorrhea                                            | 13 (1%)                      | 9 (1%)             | 10 (1%)                        | 8 (1%)             |
| C. trachomatis                                       | 20 (2%)                      | 14 (2%)            | 14 (2%)                        | 21 (2%)            |
| <b>Women only</b>                                    |                              |                    |                                |                    |
| Bacterial Vaginosis                                  | 75/432 (17%)                 | 70/441 (16%)       | 46/441 (10%)                   | 43/418 (10%)       |
| Trichomonas                                          | 22/432 (5%)                  | 24/441 (5%)        | 17/441 (4%)                    | 14/418 (3%)        |
| <b>Couple type at enrollment</b>                     |                              |                    |                                |                    |
|                                                      | <b>Early</b>                 |                    | <b>Delayed</b>                 |                    |
| Male (HIV+) Female (HIV-)                            | 436 (49%)                    |                    | 417 (48%)                      |                    |
| Female (HIV+) Male (HIV-)                            | 431 (49%)                    |                    | 441 (50%)                      |                    |
| Male (HIV+) Male (HIV-)                              | 18 (2%)                      |                    | 19 (2%)                        |                    |
| Female (HIV+) Female (HIV-)                          | 1 (0%)                       |                    | 0 (0%)                         |                    |

\* Summary statistics are shown in number (%), or specified otherwise

<sup>†</sup> IQR, inter-quartile range, lower limit is 25<sup>th</sup>-percentile and upper limit is 75<sup>th</sup>-percentile

<sup>‡</sup> Denominator is the number of eligible women in each arm

### Follow-up CD4+, HIV RNA, and Their Respective IQRs by Arm

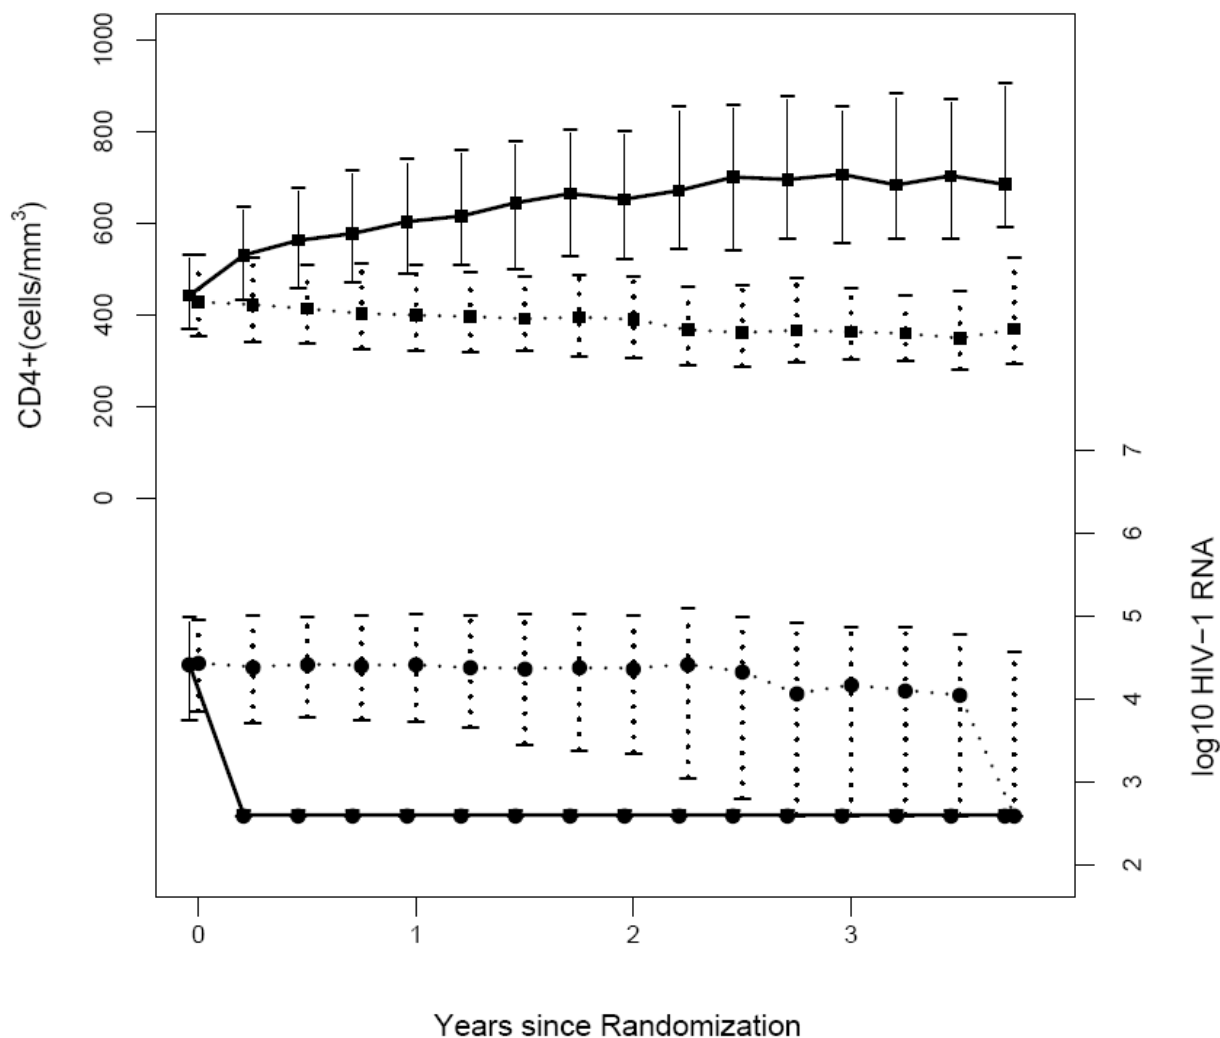

Lines are shown for median follow-up CD4 counts and viral loads of two trial arms during the study period. Solid lines are for the early arm, and dotted lines for the delayed arm. Also shown are interquartile ranges. In the early arm, mean follow-up CD4 count increases from 449 cells/mm<sup>3</sup> at enrollment to 742 cells/mm<sup>3</sup> at month 45 visit, and percentage of follow-up VL<400 increases from 6% at enrollment to 97% at month 45 visit. In the delayed arm, mean follow-up CD4 count decreases from 449 cells/mm<sup>3</sup> at enrollment to 400 cells/mm<sup>3</sup> at month 45 visit, and percentage of follow-up VL<400 increases from 5% at enrollment to 24% at month 30 visit but decreases to a range of 0-5% between month 33 and month 45 visits.

## Incidence of Transmission and Clinical Events by Region

### Incidence Rates and 95% Confidence Intervals for Linked HIV-1 Transmissions, All HIV-1 Transmissions, Clinical Events, and Composite Event

| Region/Sites*              | Linked Transmission |                   | All Transmission |                   | Clinical Event |                   | Composite Event |                   |
|----------------------------|---------------------|-------------------|------------------|-------------------|----------------|-------------------|-----------------|-------------------|
|                            | Incidence           | 95% CI            | Incidence        | 95% CI            | Incidence      | 95% CI            | Incidence       | 95% CI            |
| <b>African</b>             | <b>1.6</b>          | <b>[1.0, 2.4]</b> | <b>2.3</b>       | <b>[1.6, 3.2]</b> | <b>3.1</b>     | <b>[2.3, 4.1]</b> | <b>3.8</b>      | <b>[2.9, 4.9]</b> |
| Gaborone, Botswana         | 1.1                 | [0.0, 6.1]        | 2.2              | [0.3, 7.9]        | 3.2            | [0.7, 9.4]        | 4.2             | [1.1, 10.7]       |
| Kisumu, Kenya              | 0.0                 | [0.0, 6.7]        | 0.0              | [0.0, 6.7]        | 3.5            | [0.4, 12.8]       | 0.0             | [0.0, 6.4]        |
| Blantyre, Malawi           | 2.9                 | [1.4, 5.3]        | 3.2              | [1.6, 5.7]        | 1.8            | [0.7, 3.6]        | 3.8             | [2.2, 6.3]        |
| Lilongwe, Malawi           | 2.4                 | [1.2, 4.4]        | 3.4              | [1.8, 5.7]        | 3.8            | [2.2, 6.1]        | 5.2             | [3.3, 7.8]        |
| Johannesburg, South Africa | 0.0                 | [0.0, 5.2]        | 0.0              | [0.0, 5.2]        | 4.2            | [0.9, 12.2]       | 0.0             | [0.0, 4.8]        |
| Soweto, South Africa       | 0.0                 | [0.0, 7.8]        | 2.1              | [0.1, 11.8]       | 4.1            | [0.5, 14.6]       | 4.0             | [0.5, 14.5]       |
| Harare, Zimbabwe           | 0.5                 | [0.1, 1.9]        | 1.0              | [0.3, 2.7]        | 3.2            | [1.7, 5.4]        | 3.4             | [1.8, 5.6]        |
| <b>Asia</b>                | <b>0.2</b>          | <b>[0.0, 0.6]</b> | <b>0.3</b>       | <b>[0.1, 0.8]</b> | <b>4.0</b>     | <b>[2.9, 5.3]</b> | <b>2.6</b>      | <b>[1.8, 3.7]</b> |
| Chennai, India             | 0.2                 | [0.0, 1.1]        | 0.2              | [0.0, 1.1]        | 6.3            | [4.3, 8.8]        | 3.4             | [2.0, 5.3]        |
| Pune, India                | 0.0                 | [0.0, 0.9]        | 0.0              | [0.0, 0.9]        | 2.5            | [1.2, 4.6]        | 2.3             | [1.0, 4.3]        |
| Chiang Mai, Thailand       | 0.4                 | [0.0, 2.4]        | 0.9              | [0.1, 3.2]        | 1.6            | [0.4, 4.2]        | 1.6             | [0.4, 4.2]        |
| <b>South America</b>       | <b>0.5</b>          | <b>[0.1, 1.5]</b> | <b>0.5</b>       | <b>[0.1, 1.5]</b> | <b>1.9</b>     | <b>[1.0, 3.3]</b> | <b>1.9</b>      | <b>[1.0, 3.3]</b> |
| Porto Alegre, Brazil       | 0.5                 | [0.0, 3.0]        | 0.5              | [0.0, 3.0]        | 1.1            | [0.1, 3.8]        | 1.6             | [0.3, 4.6]        |
| Rio de Janeiro, Brazil     | 0.5                 | [0.1, 1.7]        | 0.5              | [0.1, 1.7]        | 2.3            | [1.1, 4.2]        | 2.0             | [0.9, 3.9]        |

\*Data for the two couples enrolled at the site in Boston, MA, USA are not included as the enrollment was so low and follow-up time so short that incidence rate estimates are imprecise.



## Adherence Counseling Checklists

### HPTN 052 Adherence Counseling Checklist: Initial Visit

A **physician or clinician** conducting the following items:

\_\_\_\_\_ **Discussion of the importance of good doctor-patient communication**

- Reinforce that successful HIV treatment relies on good doctor-patient communication
- Assure the participants that they can ask any question at any time throughout the study

\_\_\_\_\_ **Education about HIV medications and adherence**

- Explain the concepts of viral replication, mutation, and resistance
- Emphasize that poor adherence can lead to resistance and that 95-100% adherence is optimal
- Explain the concept of viral load and how it will be used to monitor health and resistance
- Warn against sharing ART with others

\_\_\_\_\_ **Introduction of ART regimen**

- Show the participants each pill, teach its name, and explain what it does
- Discuss the dosing of each pill (when and how many) and any food restrictions

\_\_\_\_\_ **Review of side effects**

- Review the side effects of each component of the index case's particular regimen
- Explain the importance of adherence regardless of side effects
- Emphasize that many side effects will decrease automatically or can be treated

An **adherence counselor** conducting the following items:

\_\_\_\_\_ **Build rapport**

- Discuss living with HIV, health maintenance, and the reasons the couple joined the study
- Emphasize that they can ask any questions at any time throughout the study

\_\_\_\_\_ **Define medication adherence**

- Explain that adherence is the degree to which a person sticks to the prescribed regimen
- Emphasize the collaborative process and taking an active role in one's treatment

\_\_\_\_\_ **Education about HIV medications and adherence (repeat of information from clinician)**

- Review association of nonadherence to the potential for medication resistance

\_\_\_\_\_ **Review of side effects (repeat of information from clinician)**

- Review the expectations about side effects, and that generally they can get better over time.
- Emphasize the importance about continued communication about side effects

\_\_\_\_\_ **Discussion of good doctor-patient communication (repeat of information from clinician)**

- Review the need to always ask questions so that the best decisions can be made about medicines.

\_\_\_\_\_ **Introduction of ART regimen (repeat information from clinician)**

- Review regimen
- Ask the participants to articulate the information and correct any misunderstandings

\_\_\_\_\_ **Create a simple and concrete daily medication schedule (participant's adherence plan)**

- Finalize a concrete, simplified adherence plan using any appropriate tools (*e.g.* pill boxes)
- Discuss when the doses will be taken in different circumstances (*e.g.*, at home, at work)
- Review food restrictions and ensure that the plan accommodates specific medications

\_\_\_\_\_ **Develop reminder strategies**

- Specifically address the involvement of the partner and/or other support people
- Suggest and discuss over reminder strategies (*e.g.*, watch, timer, notes)

\_\_\_\_\_ **Discussion of family, community, social support, and privacy**

- Discuss who knows the index case's HIV status and how they can help with adherence
- Strategize how the participant can keep their HIV status private and still maintain adherence

\_\_\_\_\_ **Address additional potential barriers to adherence**

- Brainstorm about potential barriers to adherence and ways to overcome such obstacles

\_\_\_\_\_ **Address handling slips (missed doses)**

- Emphasize that although the goal is optimal adherence, no one is perfect
- Discuss ways to get back on track as soon as possible after a missed dose

\_\_\_\_\_ **Attending appointments and contact information**

- Discuss how the participant will get to future appointments, if necessary, strategize about potential barriers to attendance (*e.g.*, transportation)
- Make sure that the participants have contact information for questions or emergencies

\_\_\_\_\_ **General review**

- What questions do you have about your regimen?

**HPTN 052 Adherence Counseling Checklist: Follow-up Visit**

An **adherence counselor** conducting the following items:

\_\_\_\_\_ **Continue to build rapport**

- Encourage the participants to start the sessions with their concerns or questions
- Emphasize that participants can ask any questions at any time throughout the study

\_\_\_\_\_ **Review the concept of medication adherence**

- Confirm that the participants understand the concept of medication adherence
- Answer any questions and correct any misunderstandings, consult a clinician if necessary

\_\_\_\_\_ **Review information about HIV medications and adherence**

- Confirm that the participants understand the relationship between adherence and resistance
- Emphasize that ART should not be shared with others

\_\_\_\_\_ **Review of side effects**

- Ask the participants what questions they have about side effects
- Assist the participants in eliminating or reducing side effects, consult a clinician if necessary

\_\_\_\_\_ **Review the status of the participants' doctor-patient communication**

- Ensure that participants are still comfortable talking to the clinicians about treatment issues
- If problems exist, assist participants in improving communication

\_\_\_\_\_ **Review the participant's ART regimen**

- If the participant is still unfamiliar with the regimen or the ART has changed, review the particulars of each drug – what it looks like, its name, what it does, and how it is taken
- Answer any questions related to the ART regimen, consult a clinician if necessary

\_\_\_\_\_ **Review the participant's concrete daily medication schedule (participant's adherence plan)**

- Determine the usefulness of the various components of the participant's adherence plan
- Make adjustments to the adherence plan as necessary

\_\_\_\_\_ **Review reminder strategies**

- Ask about the usefulness of the reminder strategies being used, including partner support
- Suggest alternatives and new approaches as appropriate

\_\_\_\_\_ **Review the role of family, community, social support, and privacy**

- Discuss how the participants' family and friends are helping or hindering adherence
- Determine if privacy issues are negatively influencing adherence
- Suggest alternatives and new approaches as appropriate

\_\_\_\_\_ **Review additional potential barriers to adherence**

- Determine if any new barriers to adherence have arisen, help address these issues

\_\_\_\_\_ **Address handling slips (missed doses)**

- Ask the participants how they have handled missed doses
- Discuss ways to handle similar situations in the future, consult a clinician if necessary

\_\_\_\_\_ **Attending appointments and contact information**

- If participants are having trouble coming to their appointments, discuss alternative strategies
- Make sure that the participants have contact information for questions or emergencies

**Most Frequently Used Initial Primary Regimens by Arm**

|                                    | <b>Early Arm</b> | <b>Delayed Arm</b> | <b>Total</b> |
|------------------------------------|------------------|--------------------|--------------|
| <b>N initiated primary regimen</b> | 886              | 184                | 1070         |
| (AZT/3TC)/EFV                      | 641 (72%)        | 129 (70%)          | 770 (72%)    |
| (AZT/3TC)/ATV                      | 88 (10%)         | 13 (7%)            | 101 (9%)     |
| (FTC/TDF)/EFV                      | 80 (9%)          | 21 (11%)           | 101 (9%)     |
| (AZT/3TC)/(LPV/RTV)                | 60 (7%)          | 3 (2%)             | 63 (6%)      |
| Other                              | 17 (2%)          | 18 (10%)           | 35 (3%)      |

**Most Frequently Used Primary Regimen by Site and by Arm**

**Initial Primary Regimen, by Site – Early Arm (Americas and Asia)**

|                                    | Total      | North/South America     |                              |               | Asia              |             |                         |
|------------------------------------|------------|-------------------------|------------------------------|---------------|-------------------|-------------|-------------------------|
|                                    |            | Porto Alegre,<br>Brazil | Rio de<br>Janeiro,<br>Brazil | Boston,<br>US | Chennai,<br>India | Pune, India | Chiang Mai,<br>Thailand |
| <b>N index enrolled</b>            | 886        | 47                      | 95                           | 0             | 125               | 89          | 53                      |
| <b>N initiated primary regimen</b> | 886 (100%) | 47 (100%)               | 95 (100%)                    | 0 (-%)        | 125 (100%)        | 89 (100%)   | 53 (100%)               |
| (AZT/3TC)/EFV                      | 641 (72%)  | 27 (57%)                | 77 (81%)                     | 0 (-%)        | 121 (97%)         | 68 (76%)    | 31 (58%)                |
| (AZT/3TC)/ATV                      | 88 (10%)   | 19 (40%)                | 16 (17%)                     | 0 (-%)        | 0 (0%)            | 13 (15%)    | 9 (17%)                 |
| (FTC/TDF)/EFV                      | 80 (9%)    | 1 (2%)                  | 2 (2%)                       | 0 (-%)        | 4 (3%)            | 3 (3%)      | 6 (11%)                 |
| (AZT/3TC)/(LPV/RTV)                | 60 (7%)    | 0 (0%)                  | 0 (0%)                       | 0 (-%)        | 0 (0%)            | 4 (4%)      | 4 (8%)                  |
| (AZT/3TC)/ATV/RTV                  | 8 (1%)     | 0 (0%)                  | 0 (0%)                       | 0 (-%)        | 0 (0%)            | 0 (0%)      | 0 (0%)                  |
| 3TC/TDF/EFV                        | 6 (1%)     | 0 (0%)                  | 0 (0%)                       | 0 (-%)        | 0 (0%)            | 0 (0%)      | 3 (6%)                  |
| (AZT/3TC)/ATV/RTV-generic          | 1 (<1%)    | 0 (0%)                  | 0 (0%)                       | 0 (-%)        | 0 (0%)            | 1 (1%)      | 0 (0%)                  |
| (LPV/RTV)/(FTC/TDF)                | 1 (<1%)    | 0 (0%)                  | 0 (0%)                       | 0 (-%)        | 0 (0%)            | 0 (0%)      | 0 (0%)                  |
| 3TC/ATV/d4T                        | 1 (<1%)    | 0 (0%)                  | 0 (0%)                       | 0 (-%)        | 0 (0%)            | 0 (0%)      | 0 (0%)                  |

**Initial Primary Regimen, by Site – Early Arm (Africa)**

|                                    | Total      | Africa                |                  |                     |                     |                               |                            |                     |
|------------------------------------|------------|-----------------------|------------------|---------------------|---------------------|-------------------------------|----------------------------|---------------------|
|                                    |            | Gaborone,<br>Botswana | Kisumu,<br>Kenya | Blantyre,<br>Malawi | Lilongwe,<br>Malawi | Johannesburg,<br>South Africa | Soweto,<br>South<br>Africa | Harare,<br>Zimbabwe |
| <b>N index enrolled</b>            | 886        | 38                    | 30               | 115                 | 126                 | 24                            | 25                         | 119                 |
| <b>N initiated primary regimen</b> | 886 (100%) | 38 (100%)             | 30 (100%)        | 115 (100%)          | 126 (100%)          | 24 (100%)                     | 25 (100%)                  | 119 (100%)          |
| (AZT/3TC)/EFV                      | 641 (72%)  | 0 (0%)                | 13 (43%)         | 95 (83%)            | 86 (68%)            | 8 (33%)                       | 18 (72%)                   | 97 (82%)            |
| (AZT/3TC)/ATV                      | 88 (10%)   | 0 (0%)                | 14 (47%)         | 2 (2%)              | 11 (9%)             | 0 (0%)                        | 0 (0%)                     | 4 (3%)              |
| (FTC/TDF)/EFV                      | 80 (9%)    | 36 (95%)              | 1 (3%)           | 8 (7%)              | 6 (5%)              | 6 (25%)                       | 5 (20%)                    | 2 (2%)              |
| (AZT/3TC)/(LPV/RTV)                | 60 (7%)    | 2 (5%)                | 1 (3%)           | 10 (9%)             | 22 (17%)            | 2 (8%)                        | 2 (8%)                     | 13 (11%)            |
| (AZT/3TC)/ATV/RTV                  | 8 (1%)     | 0 (0%)                | 0 (0%)           | 0 (0%)              | 0 (0%)              | 8 (33%)                       | 0 (0%)                     | 0 (0%)              |
| 3TC/TDF/EFV                        | 6 (1%)     | 0 (0%)                | 0 (0%)           | 0 (0%)              | 0 (0%)              | 0 (0%)                        | 0 (0%)                     | 3 (3%)              |
| (AZT/3TC)/ATV/RTV-generic          | 1 (<1%)    | 0 (0%)                | 0 (0%)           | 0 (0%)              | 0 (0%)              | 0 (0%)                        | 0 (0%)                     | 0 (0%)              |
| (LPV/RTV)/(FTC/TDF)                | 1 (<1%)    | 0 (0%)                | 0 (0%)           | 0 (0%)              | 1 (1%)              | 0 (0%)                        | 0 (0%)                     | 0 (0%)              |
| 3TC/ATV/d4T                        | 1 (<1%)    | 0 (0%)                | 1 (3%)           | 0 (0%)              | 0 (0%)              | 0 (0%)                        | 0 (0%)                     | 0 (0%)              |

**Initial Primary Regimen, by Site - Delayed Arm (Americas and Asia)**

|                                    | Total     | North/South America  |                        |            | Asia           |             |                      |
|------------------------------------|-----------|----------------------|------------------------|------------|----------------|-------------|----------------------|
|                                    |           | Porto Alegre, Brazil | Rio de Janeiro, Brazil | Boston, US | Chennai, India | Pune, India | Chiang Mai, Thailand |
| <b>N index enrolled</b>            | 877       | 43                   | 91                     | 2          | 125            | 86          | 53                   |
| <b>N initiated primary regimen</b> | 184 (21%) | 10 (23%)             | 37 (41%)               | 1 (50%)    | 27 (22%)       | 23 (27%)    | 22 (42%)             |
| (AZT/3TC)/EFV                      | 129 (70%) | 7 (70%)              | 26 (70%)               | 0 (0%)     | 25 (93%)       | 14 (61%)    | 13 (59%)             |
| (FTC/TDF)/EFV                      | 21 (11%)  | 0 (0%)               | 7 (19%)                | 1 (100%)   | 2 (7%)         | 2 (9%)      | 2 (9%)               |
| (AZT/3TC)/ATV                      | 13 (7%)   | 2 (20%)              | 1 (3%)                 | 0 (0%)     | 0 (0%)         | 0 (0%)      | 7 (32%)              |
| (AZT/3TC)/NVP                      | 9 (5%)    | 0 (0%)               | 0 (0%)                 | 0 (0%)     | 0 (0%)         | 6 (26%)     | 0 (0%)               |
| (AZT/3TC)/(LPV/RTV)                | 3 (2%)    | 0 (0%)               | 1 (3%)                 | 0 (0%)     | 0 (0%)         | 0 (0%)      | 0 (0%)               |
| NVP/3TC/d4T                        | 3 (2%)    | 0 (0%)               | 0 (0%)                 | 0 (0%)     | 0 (0%)         | 0 (0%)      | 0 (0%)               |
| 3TC/EFV/d4T                        | 2 (1%)    | 0 (0%)               | 0 (0%)                 | 0 (0%)     | 0 (0%)         | 1 (4%)      | 0 (0%)               |
| (FTC/TDF)/ATV/RTV                  | 1 (1%)    | 0 (0%)               | 1 (3%)                 | 0 (0%)     | 0 (0%)         | 0 (0%)      | 0 (0%)               |
| (LPV/RTV)/(FTC/TDF)                | 1 (1%)    | 0 (0%)               | 1 (3%)                 | 0 (0%)     | 0 (0%)         | 0 (0%)      | 0 (0%)               |
| 3TC/TDF/EFV                        | 1 (1%)    | 1 (10%)              | 0 (0%)                 | 0 (0%)     | 0 (0%)         | 0 (0%)      | 0 (0%)               |
| NVP/(FTC/TDF)                      | 1 (1%)    | 0 (0%)               | 0 (0%)                 | 0 (0%)     | 0 (0%)         | 0 (0%)      | 0 (0%)               |

**Initial Primary Regimen, by Site - Delayed Arm (Africa)**

|                                    | Total     | Africa                |                  |                     |                     |                               |                            |                     |
|------------------------------------|-----------|-----------------------|------------------|---------------------|---------------------|-------------------------------|----------------------------|---------------------|
|                                    |           | Gaborone,<br>Botswana | Kisumu,<br>Kenya | Blantyre,<br>Malawi | Lilongwe,<br>Malawi | Johannesburg,<br>South Africa | Soweto,<br>South<br>Africa | Harare,<br>Zimbabwe |
| <b>N index enrolled</b>            | 877       | 39                    | 30               | 115                 | 125                 | 22                            | 25                         | 121                 |
| <b>N initiated primary regimen</b> | 184 (21%) | 1 (3%)                | 2 (7%)           | 15 (13%)            | 21 (17%)            | 4 (18%)                       | 1 (4%)                     | 20 (17%)            |
| (AZT/3TC)/EFV                      | 129 (70%) | 0 (0%)                | 2 (100%)         | 12 (80%)            | 17 (81%)            | 1 (25%)                       | 0 (0%)                     | 12 (60%)            |
| (FTC/TDF)/EFV                      | 21 (11%)  | 1 (100%)              | 0 (0%)           | 2 (13%)             | 0 (0%)              | 3 (75%)                       | 1 (100%)                   | 0 (0%)              |
| (AZT/3TC)/ATV                      | 13 (7%)   | 0 (0%)                | 0 (0%)           | 0 (0%)              | 2 (10%)             | 0 (0%)                        | 0 (0%)                     | 1 (5%)              |
| (AZT/3TC)/NVP                      | 9 (5%)    | 0 (0%)                | 0 (0%)           | 0 (0%)              | 0 (0%)              | 0 (0%)                        | 0 (0%)                     | 3 (15%)             |
| (AZT/3TC)/(LPV/RTV)                | 3 (2%)    | 0 (0%)                | 0 (0%)           | 1 (7%)              | 1 (5%)              | 0 (0%)                        | 0 (0%)                     | 0 (0%)              |
| NVP/3TC/d4T                        | 3 (2%)    | 0 (0%)                | 0 (0%)           | 0 (0%)              | 0 (0%)              | 0 (0%)                        | 0 (0%)                     | 3 (15%)             |
| 3TC/EFV/d4T                        | 2 (1%)    | 0 (0%)                | 0 (0%)           | 0 (0%)              | 0 (0%)              | 0 (0%)                        | 0 (0%)                     | 1 (5%)              |
| (FTC/TDF)/ATV/RTV                  | 1 (1%)    | 0 (0%)                | 0 (0%)           | 0 (0%)              | 0 (0%)              | 0 (0%)                        | 0 (0%)                     | 0 (0%)              |
| (LPV/RTV)/(FTC/TDF)                | 1 (1%)    | 0 (0%)                | 0 (0%)           | 0 (0%)              | 0 (0%)              | 0 (0%)                        | 0 (0%)                     | 0 (0%)              |
| 3TC/TDF/EFV                        | 1 (1%)    | 0 (0%)                | 0 (0%)           | 0 (0%)              | 0 (0%)              | 0 (0%)                        | 0 (0%)                     | 0 (0%)              |
| NVP/(FTC/TDF)                      | 1 (1%)    | 0 (0%)                | 0 (0%)           | 0 (0%)              | 1 (5%)              | 0 (0%)                        | 0 (0%)                     | 0 (0%)              |



**ART Adherence by Pill Count by Arm**

|                             | <b>Total</b> | <b>Early Arm</b> | <b>Delayed Arm</b> |
|-----------------------------|--------------|------------------|--------------------|
| <b>N index on ART</b>       | 1149         | 881*             | 268**              |
| <b>Summary of Adherence</b> |              |                  |                    |
| Missing                     | 7 (1%)       | 2 (<1%)          | 5 (2%)             |
| Adherence>105%              | 42 (4%)      | 28 (3%)          | 14 (5%)            |
| Evaluated                   | 1100 (96%)   | 851 (97%)        | 249 (93%)          |
| Adherence>=75%              | 1053 (96%)   | 812 (95%)        | 241 (97%)          |
| Adherence>=95%              | 855 (78%)    | 671 (79%)        | 184 (74%)          |
| % Mean (SD)                 | 95 (13)      | 95 (14)          | 95 (9)             |
| % Median                    | 99           | 99               | 99                 |
| % Min, Max                  | 0, 105       | 0, 105           | 35, 104            |
| % Q1, Q3                    | 96, 100      | 96, 100          | 95, 100            |

\* Five HIV-infected participants in the early arm were dispensed ART at enrollment, but never returned for follow-up; therefore, no pill count data are available for these participants.

\*\* The number of people in the delayed arm on ART includes 84 participants who took ART for the prevention of vertical HIV transmission during pregnancy.

## Clinical Endpoints by Arm

### Clinical Endpoints\*, by Arm – HIV-1 Infected Participants

|                                                                                                                             | <b>Total</b> | <b>Early Arm</b> | <b>Delayed Arm</b> |
|-----------------------------------------------------------------------------------------------------------------------------|--------------|------------------|--------------------|
| <b>Total Number of Events [1]</b>                                                                                           | <b>129</b>   | <b>53</b>        | <b>76</b>          |
| Mycobacterium tuberculosis, pulmonary [2]                                                                                   | 30           | 14               | 16                 |
| Bacterial infections, severe                                                                                                | 27           | 16               | 11                 |
| Death                                                                                                                       | 23           | 10               | 13                 |
| Mycobacterium tuberculosis, extrapulmonary                                                                                  | 20           | 3                | 17                 |
| Herpes simplex, chronic                                                                                                     | 10           | 3                | 7                  |
| Bacterial pneumonia, recurrent, severe                                                                                      | 4            | 2                | 2                  |
| Oesophageal candidiasis                                                                                                     | 4            | 2                | 2                  |
| Cervical carcinoma, invasive, confirmed by biopsy                                                                           | 2            | 0                | 2                  |
| Kaposi's sarcoma                                                                                                            | 2            | 1                | 1                  |
| Wasting syndrome due to HIV associated with either chronic diarrhea or chronic weakness and documented fever $\geq$ 1 month | 2            | 0                | 2                  |
| Cryptococcosis, extrapulmonary including meningitis                                                                         | 1            | 1                | 0                  |
| Encephalopathy, HIV-related                                                                                                 | 1            | 0                | 1                  |
| Lymphoma, Burkitt, immunoblastic, primary central nervous system/cerebral, B cell non Hodgkin                               | 1            | 0                | 1                  |
| Pneumocystis pneumonia                                                                                                      | 1            | 0                | 1                  |
| Septicemia, recurrent, including non-typhoidal Salmonella                                                                   | 1            | 1                | 0                  |

\*The clinical endpoints include WHO stage 4 events, mycobacterium tuberculosis pulmonary or severe bacterial infections.

[1] A total of 105 participants had at least one clinical event; 15 participants had two or more distinct clinical events. If a participant had multiple events during study follow-up, then all events are counted in this table.

[2] Thirteen (13) people in the early arm had 14 cases of pulmonary TB, and 15 people in the delayed arm had 16 cases of pulmonary TB.

### HIV-1 Infected Participants with Two or More Distinct Clinical Events

|                                                                                                                   | Total     | Early Arm | Delayed Arm |
|-------------------------------------------------------------------------------------------------------------------|-----------|-----------|-------------|
| <b>Combination of Events (Total)</b>                                                                              | <b>15</b> | <b>7</b>  | <b>8</b>    |
| Bacterial infection, severe / TB                                                                                  | 3         | 3         | 0           |
| Bacterial infection, severe / extrapulmonary TB                                                                   | 1         | 0         | 1           |
| Bacterial infection, severe / Bacterial pneumonia, recurrent, severe / TB                                         | 1         | 0         | 1           |
| Bacterial infection, severe / Bacterial pneumonia, recurrent, severe / Oesophageal candidiasis                    | 1         | 1         | 0           |
| Bacterial infection, severe / Septicemia, recurrent                                                               | 1         | 1         | 0           |
| Bacterial infection, severe / Death                                                                               | 2         | 1         | 1           |
| Herpes simplex, chronic / TB / Death                                                                              | 1         | 1         | 0           |
| Lymphoma, Burkitt, immunoblastic, primary central nervous system/cerebral, B cell non Hodgkin / extrapulmonary TB | 1         | 0         | 1           |
| TB / Death                                                                                                        | 2         | 0         | 2           |
| Bacterial pneumonia, recurrent, severe / TB / Death                                                               | 1         | 0         | 1           |
| Encephalopathy, HIV-related / extrapulmonary TB                                                                   | 1         | 0         | 1           |

\*See Footnote # 2 in the “Clinical Endpoints by Arm – HIV-1 Infected Participants” table above, indicating that two individuals had two cases of pulmonary TB over time; those cases are not counted in this table as they are the same event.

## Graded Lab Abnormalities by Arm

### Graded Lab Abnormalities, by Arm – HIV-1 Infected Participants

|                      | Early Arm (N=881) |         | Delayed Arm (N=872) |         |
|----------------------|-------------------|---------|---------------------|---------|
|                      | Grade 3           | Grade 4 | Grade 3             | Grade 4 |
| ALT (SGPT)           | 16 (1%)           | 5 (<1%) | 10 (1%)             | 5 (<1%) |
| AST (SGOT)           | 16 (1%)           | 10 (1%) | 15 (1%)             | 5 (<1%) |
| Albumin              | 3 (<1%)           | 0 (0%)  | 9 (1%)              | 0 (0%)  |
| Alkaline Phosphatase | 0 (0%)            | 0 (0%)  | 1 (<1%)             | 0 (0%)  |
| Creatinine           | 0 (0%)            | 0 (0%)  | 4 (<1%)             | 1 (<1%) |
| Hemoglobin           | 9 (1%)            | 12 (1%) | 6 (<1%)             | 10 (1%) |
| Neutrophils          | 77 (8%)           | 18 (2%) | 37 (4%)             | 9 (1%)  |
| Phosphate            | 58 (6%)           | 1 (<1%) | 53 (6%)             | 1 (<1%) |
| Platelets            | 5 (<1%)           | 2 (<1%) | 8 (<1%)             | 7 (<1%) |
| Potassium            | 3 (<1%)           | 0 (0%)  | 2 (<1%)             | 1 (<1%) |
| Sodium               | 4 (<1%)           | 0 (0%)  | 1 (<1%)             | 1 (<1%) |
| Total Bilirubin      | 48 (5%)           | 9 (1%)  | 7 (<1%)             | 1 (<1%) |
| WBC                  | 2 (<1%)           | 1 (<1%) | 2 (<1%)             | 0 (0%)  |

**Incidence of Adverse Events by MedDRA Body System by Arm**

|                                                                     | <b>Total</b> |       | <b>Early Arm</b> |       | <b>Delayed Arm</b> |       |
|---------------------------------------------------------------------|--------------|-------|------------------|-------|--------------------|-------|
| <b>N HIV-1 Infected Participants Enrolled</b>                       | 1763         |       | 886              |       | 877                |       |
| <b>N HIV-1 Infected Participants with One or More AEs*</b>          | 246          | (14%) | 127              | (14%) | 119                | (14%) |
| <b>MedDRA Body System</b>                                           |              |       |                  |       |                    |       |
| Blood and lymphatic system disorders                                | 2            | (<1%) | 0                | (0%)  | 2                  | (<1%) |
| Cardiac disorders                                                   | 1            | (<1%) | 0                | (0%)  | 1                  | (<1%) |
| Congenital, familial and genetic disorders                          | 1            | (<1%) | 0                | (0%)  | 1                  | (<1%) |
| Ear and labyrinth disorders                                         | 4            | (<1%) | 3                | (<1%) | 1                  | (<1%) |
| Gastrointestinal disorders                                          | 27           | (2%)  | 12               | (1%)  | 15                 | (2%)  |
| General disorders and administration site conditions                | 16           | (<1%) | 10               | (1%)  | 6                  | (<1%) |
| Hepatobiliary disorders                                             | 2            | (<1%) | 2                | (<1%) | 0                  | (0%)  |
| Immune system disorders                                             | 2            | (<1%) | 0                | (0%)  | 2                  | (<1%) |
| Infections and infestations                                         | 91           | (5%)  | 42               | (5%)  | 49                 | (6%)  |
| Injury, poisoning and procedural complications                      | 8            | (<1%) | 8                | (<1%) | 0                  | (0%)  |
| Investigations                                                      | 1            | (<1%) | 1                | (<1%) | 0                  | (0%)  |
| Metabolism and nutrition disorders                                  | 30           | (2%)  | 16               | (2%)  | 14                 | (2%)  |
| Musculoskeletal and connective tissue disorders                     | 6            | (<1%) | 3                | (<1%) | 3                  | (<1%) |
| Neoplasms benign, malignant and unspecified (incl cysts and polyps) | 3            | (<1%) | 2                | (<1%) | 1                  | (<1%) |
| Nervous system disorders                                            | 29           | (2%)  | 20               | (2%)  | 9                  | (1%)  |
| Pregnancy, puerperium and perinatal conditions                      | 23           | (1%)  | 9                | (1%)  | 14                 | (2%)  |
| Psychiatric disorders                                               | 34           | (2%)  | 26               | (3%)  | 8                  | (<1%) |
| Renal and urinary disorders                                         | 6            | (<1%) | 3                | (<1%) | 3                  | (<1%) |
| Reproductive system and breast disorders                            | 16           | (<1%) | 8                | (<1%) | 8                  | (<1%) |
| Respiratory, thoracic and mediastinal disorders                     | 8            | (<1%) | 1                | (<1%) | 7                  | (<1%) |
| Skin and subcutaneous tissue disorders                              | 7            | (<1%) | 6                | (<1%) | 1                  | (<1%) |
| Vascular disorders                                                  | 9            | (<1%) | 4                | (<1%) | 5                  | (<1%) |

\*Primary Clinical events (death, WHO stage 4 events, pulmonary TB, and severe bacterial infection) are excluded from the table. Other potential HIV/AIDS related events are included. Laboratory abnormalities are also excluded and reported in a separate table.

## Death Summary

### Death Summary – HIV-1 Infected Participants

| Cause of Death                           | ART at time of death | Most recent CD4 prior to death | Most recent viral load prior to death |
|------------------------------------------|----------------------|--------------------------------|---------------------------------------|
| <b>Early Arm</b>                         |                      |                                |                                       |
| Suicide, unknown cause                   | EFV, FTC/TDF         | 500                            | <400                                  |
| Gastroenteritis                          | 3TC/ZDV, EFV         | 469                            | <400                                  |
| Miliary tuberculosis                     | 3TC/ZDV, EFV         | 318                            | <400                                  |
| Suicide (hanging)                        | EFV, 3TC, TDF        | 800                            | <400                                  |
| Unknown, alcohol history                 | 3TC/ZDV, EFV         | 525                            | <400                                  |
| Meningococcal sepsis                     | EFV, 3TC, d4T        | 578                            | <400                                  |
| Unknown                                  | EFV, 3TC, d4T        | Missing                        | 92,371                                |
| Suicide (poisoning)                      | EFV, FTC/TDF         | 419                            | <400                                  |
| Unknown                                  | EFV, 3TC, d4T        | 353                            | 133,000                               |
| Leptospirosis                            | EFV, 3TC, d4T        | 482                            | <400                                  |
| <b>Delayed Arm</b>                       |                      |                                |                                       |
| Adenocarcinoma of stomach                | EFV, d4T, 3TC        | 81                             | <400                                  |
| Unknown, recent empyema                  | 3TC/ZDV, EFV         | 197                            | <400                                  |
| Tuberculosis                             | not on ART           | 31                             | 187,486                               |
| Unknown                                  | not on ART           | 421                            | 215,909                               |
| Motor vehicle accident                   | 3TC/ZDV, EFV         | 396                            | <400                                  |
| Unknown                                  | not on ART           | 372                            | 57,600                                |
| Pneumococcal sepsis; probably meningitis | not on ART           | 480                            | 56,550                                |
| Unknown                                  | not on ART           | 495                            | 757,539                               |
| Unknown                                  | not on ART           | 351                            | 23,300                                |
| Unknown, alcohol history                 | not on ART           | 504                            | 53,200                                |
| Motor vehicle accident                   | not on ART           | 382                            | 302,000                               |
| Tuberculosis                             | not on ART           | 303                            | 368,000                               |
| Cerebral vascular accident               | not on ART           | 364                            | 252,000                               |

## Acknowledgements

### Acknowledgements for Each Participating Site and Other Collaborating Institutions and Individuals.

#### Study sites listed by Region:

#### AMERICAS

##### Rio de Janeiro, Brazil:

**Instituto de Pesquisa Clinica Evandro Chaga (IPEC):** Valdilea Goncalves Veloso, Ruth Khalili Friedman, Sandra Wagner Cardoso, Guilherme Amaral Calvet, Maria Pia Diniz Ribeiro, Isabel C. Tavares, Maria R. Rocha, Nilo Martinez Fernandes, Ronaldo Ismerio Moreira, Margarete Paiva, Sandra Filgueiras, Daniel Waite, Mariza Goncalves Morgado, Lidiane Tuler, Ingeborg Georg, Ivan Neves Jr., Angela C. Andrade, Lucia Sena, Thiago Torres, Marilia Santini de Oliveira, Brenda Hoagland, Juan C. Raxach, Cristina Pimenta, Valeria Ribeiro, Jorge Nunes, Ludmila da Silva Alves, Ricardo H. Freitas, Lucia H. Cardoso de Souza

**Hospital Geral de Nova Iguaçu (HGNI):** Tania Brum, Flavio Bustorff, Maria Isabel do Nascimento, Lara Somma Portela, Aline Ramalho, Ana Claudia Rodrigues, Cintia Lopes da Silva, Tatiana Muniz de Chã

**Hospital dos Servidores do Estado (HSE) (site closed prior to 2007):** Esau C. Joao and Leon Claude Sidi

**Porto Alegre, Brazil:** Marineide G. de Melo, Rita A. Lira, Kelin R. Zabtowski, Andréa C. Castro, Rui Flores, Melina Grudzinski, André L. da Silva, Dimas A. Kliemann, Cláudio M. Campello, Ivete C. Canti, Elizabeth S. Magalhães, Consuelo F. Perez, Mara L. Silveira, Julio Barris, Marcelo E. Almeida, Maria C. Seter, Maria L. Turella, Carmen L. Fernandes, Leda Curra, Mariana R. Simon, Salete M. Zabtowski, Inelva Miotto, Fabria Chiarani, Deise T. Ramos, Claudia C. Gottert, Magnus C. de Melo, Roberta F. dos Santos

**Boston, Massachusetts, USA (site closed prior to 2007):** Marcy Gelman, Ana Maldonado, Robbie Singal, Steven Safren, Rodney Vanderwarker

#### ASIA

**Chennai, India:** Aylur Kailasom Srikrishnan, Jabin Sharma, Easter Thamburaj, Jeeva Arumugham, Narayanan Govindarajan, Poongulalli Selvamuthu

**Pune, India:** Ramesh Paranjape, Arun Risbud, Srikanth Tripathy, Raman Gangakhedkar, Seema Sahay, Smita Kulkarni, Manisha Ghate, Madhuri Thakar, Sampada Dhayarkar, Arati Mane, Varsha Kale, Sangita Kulkarni, Bharati Mahajan, Radhika Brahme, Neelam Joglekar, Neeta Pradhan, Sumitra Krishnan, Swapna Kanitkar, Rajeshwari Deshmukh, Archana Beri, Usha Katti, Anuradha Koli, Mallika Alexander, Rewa Kohli, Swapna Deshpande, Asmita Gaikwad, Jyoti Pawar, Prafulla Patil, Ashwini Kokil, Yogesh Nehete, Pratima Sheth, Priyanka Tupekar, Prajakta Patil, Prasad Kulkarni, Yogesh Wagh, Savita Mawal, Prajakta Dhamne, Mahesh Kharat, Aparna Parkhe, Ayesha Momin, Sachin Jadhav, Mufid Baig, Vikram Solas, Ratnaprabha Bihade, Latika Karve, Keshav Gade, Narayan Panchal, Urmila Ghodke, Harshad Nalgirkar, Sunil Gaikwad, Lalit Patil, Swati Jivane, Megha Mamulwar, Deepak Bangar, Rajesh Yadav, Manoj Gorade, Vijay Kad, Ganesh Palhade, Bipin Bangale, Sonal Shindekar, Vandana Bankar, Kiran Lakhwani, Suchitra Ganeshacharya, Chaitrali Patil, Ashwini Jagdale, Naveen Satyanna, Ashwini Patil,

Asha Francis, Vijay Chauware, Sachin Kale, Navaz Sharif., Rohini Bingewar, Ruparani Gujar, Vikas Malav, Manisha Bhandarkar, Vaishali Chimanpure, Madhuri Chandane, Nitin Hingankar, Smita Thorat, Shubhada Mankar, Shubhada Deshpande, Seema Nair, Gauri Vaidya, Deepak More, Anjali Panchanadikar, Kavita Pardeshi , Chetan More, Kishore Kumar, Shubhangi Navlakha, Vijaya Kulkarni, Sudhakar Wankhede, , Dhananjay Dadke, Madhura Nene, Sanjay Kulkarni.

**Chiang Mai, Thailand:** Voravit Suwanvanichkij, Cholticha Ruangyuttikarn, Nuntisa Chotirosniramit, Louise Walshe, Nicole Simmons, Lara Johnson, Marisa Guptarak, Clevetta Chandler, H. Peter Lange, Chanidapa Prasarakee, Thira Sirisanthana, Kriengkrai Srithanaviboonchai, Voravit Suwanvanichkij, Natthapol Kosashunhanan, Sunida Thetket, Patcharaphan Sugandhavesa, Taweewat Supindham, Kanokporn Chaiklang, Sineenart Nimsakul, Wilawan Chaikan, Thanyalak Thongphan, Saowalak Sarachai, Sontiya Mueanapai, Napha Panyo, Supatra Pookmanee, Boonlure Pruenglampoo, Wipada Cheewawat, Antika Wongthane, Kittipong Rungruengthanakit, Rassamee Keawvichit, Kanlaya Wongworapat, Piyathida Sroysuwan, Rojana Srichan, Boonyarat Puisaeng, Nataporn Kosachunhanan, Veruree Manoyos, Supaporn Sirikunpun, Nittaya Chuenchop, Boonyarat Puisaeng, Nirarnporn Jaikuar, Praphapin Suriyasorgpi, Kantaphat Dachapratoomwan, Wasun Chanchai, Darika Chittpramodya, Suthathip Wongsrithep, Karnjana Chairungsri, Pimpaka Puangpotha, Tipawal Petthed, Kunnika Jungasathit, Kulthida Chaikul, Waraporn Pasawad, Jiraporn Yamano, Nattanicha Leelasuksaree, Chiraphorn Kaewkosaba, Nattanun Suwannamas, Chamaiporn Naprom, Panida Yodkeeree, Lar Chandee, Sirikwan Dokuta, Chansom Pantip, Panudda Sothanapaisan, Jeitsada Keitkarn, Warunee Jit-Aree, Chayanid Maneechai, Kannika Boursuk, Wirat Niwatananun, Pranee Khad-Umong, Supachai Sakkhachornphop, Parinya Jongpaijitsakul, Nongluck Kabyoy, Taweeluk Vannarit, Charatdao Bunthi, Chaisiri Angkurawaranon, Pranee Sakkhachornphop, Quanhathai Kaewpoowat, Prachern Palanan, Eaksit Chaipin, Metaporn Sompong, Patcharaporn Wongphu-nga, Nunthakarn Saenrak, Pannachart Manop, Ratchanit Chaiban, Saitong Sirinam, Athawit Khudcum, Aonsutee Jannim, Rattana Kunnapa, Yuttapong Tammachai, Sunisa Butphet, Atita Panyathep, Pachern Putsyainunt, Satitpong Nunjai, Jarun Ontakrai, Paweena Khamdam, Manoo Panyamang, Kadsarin Chantan, Chatsuda Auchiang, Walailuk Hanterdsith, Wonpen Prasertwitayakij, Kesinee Treamrangsee

## **AFRICA**

**Gaborone, Botswana:** Priti Dusara, Antonia Bunga, Emily Makunike, Akeem O. Salawu, Sikhulile Moyo, Phibieon Mangwendeza, Chishamiso Mudenyanga, Motswedi Anderson, SheronDzoro, Norah Mawoko, Botshelo Molebedi, Toro Oikantswe, Banno Moorad, Maitseo Malamba, Edwin Mogaetsho, Georinah Modise, Thapelo Mmolawa, Gaone Retshabile, Erik Widenfelt, Karabo Motsisi, Tsholofelo Tsomele, Ernest Moseki, Willington Mongwa, Masego Kgafela, Chandapiwa Motsamai, Sarah Masole, Martha Moiforay, Kgomotsego Madome, Simon Masopa, Nonvula Sifiwa, Galetlwaelwe Molapisi

**Kisumu, Kenya:** Victor Akelo, Bob Chen, Debra Gust, Richard Lando, Kayla Laserson, Charles Lebaron, Beatrice Nyagol, Erick Ondieki, Clement Zeh, Arthur Ogendero, Raymond Goldstine, John Vulule, Victor Mudhune, Elizabeth Ayuo, Anne Gumbe, Vitalis Sewe, Boaz Oyaro, Wairimu Chege, Katrina Kretsinger, Janet Adhiambo, Kevin Achola, Eunice Anyiego, Eucabeth Awuonda, Emily Kerubo, Erica Mimba, Jean Muhanji, Richard Ndivo, Hilary Ngeno, George Nyamao, Mary Nyikuri, Lucy Ochieng, Sylvia Odhiambo, Evans Odipo, Eudia Odum, Phoebe Okola, Benard Okomo, Kenneth Ondenge, George O Ouma, Winnie Ouma, Elizabeth Rambara, Alice Were, Anne Adeg, Frank Angira, Nancy Atieno, Elizabeth Ogutu, Kennedy Imbuki, Abraham Katana, Phylis Mboi, Eleanor McLellan-Lemal, Dancun Okal, John Okanda, Isaiah Okello, Fred Omondi, Tereza Omoro, Pauline Ongwena, Kenneth Onyango, Valarie Opollo, Ruth Opuro, Gloria Orimba, Jecinter Oruko, Joseph Osoga, Fredrick Otieno, Risper Oyaa, Wycliff Akombi, Benson Kesa, Nick Obonyo, Wycliff Ochieng, Caleb Odhiambo, Morris Odongo, William Oremo, Wycliff Ouma, Steve Owoko



**Blantyre, Malawi:** Faustine Matchere, Nicole Carpenetti, Newton Kumwenda, Mulinda Nyirenda, Fatima Zulu, Linley Seyama, Ben Kalonga

**Lilongwe, Malawi:** Madalitso Maliwichi, Bertha Maseko, Felix Namalueso, Wiza Kumwenda, Esnath Msowoya Mkandawire, Lucy Kamalizeni, Ida Shumba, Francis Martinson, Robert Krysiak, Dorothy Sichali, George Joaki, Thokozani Nkhalamba, Noel Mumba, Debbie Kamwendo, Jean Tauzie, Franklin Kilembe, Nasi Saukila, Cecilia Kanyama, Gladys Phiri, Lebah Lugalia, Steve Mponda, Agnes Moses, Gerald Tegha, Nkhafwire Mkandawire, Lameck Chinula, Lydda Kandikole, Geoffrey Singini, Tiwonge Kumwenda, Fred Chimzimu, Limbanazo Mindiera, Emma Kachipapa, Wilberforce Mhango, Tchangani Tembo, Lucy Dzama, Innocent Mofolo, Shireen Kharodia, Enock Gamah, Arthur Sungitsa, Chimwemwe Mphande, Charity Potani, Idah Mshali, Henry Eliya, Sarah Chinyama, Egnat Katengeza, Lawrence KNhawazi, Doreen Kanyika, Chodziwadzwiwa Kabudula, Tionge Kamvaunamwali, Chiyembekezo Chafuwa, Mwai Chipeta, Allan Jumbe, Alfred Mwanyimbo, Khama Mita, Stanley Kulapani, Kamnkhwani Mtanthira, Dalitso Mzinganjira, Frank Kumbanga, Lameck Gondwe, Florence Lwanda, Omega Banda, Titha Dzewela, Tapiwa Tembo, Dan Namarika, Fredreck Kachiponde, Martha Juma, Mary Chindebv, Roseby Kazembe, Esther Mathiya, Patience Yamba, Christine Chabwera, Felluna Chauwa, Esnath Mtika, Nyanyiwe Mbeye, Louisa Fiacco, Samuel Kamanga, David Chilongozi, Harriet Chanza, Allan Jumbe, Norah Chikhungu, Zane Ramdas, Linga Munthali, Bertha Limburo, Regina Mwausegha, Sophie Mtombosola, Chitsanzi Gadi, Maganizo Majawa, Jacob Phulusa, Bessings Bandawe, Agnes Gumbo, Angella Mwaipape, Hanna Stambuli, Lusungu Msumba, Clement Mapanje, Kenneth Kasanbana, Laston Kayuni

**Johannesburg, South Africa:** Sharlaa Badal-Faesen, Francesca Conradie, Veronica Graham, Jemina Pinkie Thebe, Martha Ntshakala, Mirriam Manamathela, Jabulane Masimula, Fred Phakathi. Keagile Komane, Thembi Kubheka, Marlene Knight, Jenny Baines, Mohammed Rassool, Prudence Ive, Thando Mwelase ,Nkuli Mashabane

**Soweto, South Africa:** Sarishen Govender, Puleng Dhlamini, Ntombiyenkosi Radebe, Rebecca Lenkokile, Anusha Nana, Carita Marx, Charlene Conradie, Gugulethu Tshabalala , Meriam Montso, Mpho Motlamelle, Noxolo Dyalom, Peter Mafela, Thandekile Essien, Theogene Nshimiyimana

**Harare, Zimbabwe:** Nehemiah Nhando, Jimijika Batani, Miriam Njaya, Misai Hukuimwe, Patricia F. Mandima, Vernon T. Murenje, Tendayi D. Mutungamiri, Lawrence T. Matanhike, Lucia Chirongoma, Patience N. Ruwende, Mary N. Tichareva, Bevelyn S. Muhwati, Thandiwe H. Chirenda, Felina Mhangami, Elizabeth S Magada, Monica Nyamhuka, Jester Makwara, Beauty Nyamayaro, Loveness Mugari, Mary Manyara, Ernest Chimuka, Nancy Jokonya, Jessie Musundire, Godfrey Matimba, Abigail Mutsinze, Gilton Kadziyanike, Slyvia Manomano, Cleopatra Langa, Christina Maluwa, Wilfred T. Gurupira, Thembelihle Bafana, Evah Ncube, Alfred Gomo, Marshall Munjoma, Natsai Makanza, Fiona Mtisis, Collen Pamire, Solomon Mashinga, Jacob B. Kagona, Mugove Chahwanda, Fungai Maguramhinga, Memory Chikosha, Violet Mandioma

**HPTN CORE Operations and Coordinating Center (FHI):** Jacqueline Talley, Phaedrea Watkins, Jonathan Lucas, Rhonda White, Cheryl Cokley, Nirupama Sista, Melissa Allen, Kathy Hinson, Ward Cates, Timothy Mastro, Nancy Lamson, Gray Davis, Carolyn Yanavich

**Statistical Center for HIV/AIDS Research & Prevention (SCHARP):** Leslie Cottle, Jami Moksness, Maija Anderson , Sue Tracy-Waisanen, Debbie Lands, Stacie Kentop, Laura Robins-Morris, San-San Ou, Xin Li, Ben Masse, Deborah Donnell

**HPTN Network Laboratory:**

- HPTN Network Laboratory, Johns Hopkins Univ. School of Medicine, Baltimore, MD: Sarah Hudelson, Craig Hendrix, Charlotte Gaydos, Staff of the HPTN Network Laboratory and the JHU HIV Specialty Lab
- Laboratory of Immunoregulation, NIAID, NIH, Bethesda, MD: Thomas C. Quinn [Also a member of the HPTN Network Laboratory], Andrew Redd
- Genomics Unit, Research Technologies Section, Rocky Mountain Laboratories, DIR, NIAID, NIH, Hamilton, MT: Stephen Porcella

**Additional Acknowledgements:** Amita Gupta (Johns Hopkins University), Robert Bollinger (Johns Hopkins University)
